# Supplementary material
Source: MDPI journal article supplement (https://www.mdpi.com/2813-0618/3/1/11)
Supplement: s1 [file s1]

Archive with 3 entries (3 files):
- Supplementary File S1.pdf
- Supplementary File S2.pdf
- Supplementary File S3.pdf
